# Supplementary material
Source: PubMed Central journal article supplement (PMC7744917)
Supplement: TID-23-0-s001.pdf [file TID-23-0-s001.pdf]

## SUPPLEMENTAL APPENDIX

**Table S1.** Survey questions, type of response format and response options.

| Survey Questions                                                                                                        | Response Format       | Response Options                                                                                                                                                                                                                                                                                          |
|-------------------------------------------------------------------------------------------------------------------------|-----------------------|-----------------------------------------------------------------------------------------------------------------------------------------------------------------------------------------------------------------------------------------------------------------------------------------------------------|
| What is your role at your transplant center?                                                                            | Single answer         | <ul style="list-style-type: none"> <li>• Surgeon</li> <li>• Nephrologist</li> <li>• Clinical Coordinator</li> <li>• Social Worker</li> <li>• Administrator</li> <li>• Other</li> </ul>                                                                                                                    |
| If you live outside the United States, where do you practice                                                            | Free text             | <ul style="list-style-type: none"> <li>• Name</li> <li>• City</li> <li>• Country</li> </ul>                                                                                                                                                                                                               |
| Have you continued living donor candidate evaluations during the COVID-19 pandemic?                                     | Single answer         | <ul style="list-style-type: none"> <li>• Yes</li> <li>• No</li> </ul>                                                                                                                                                                                                                                     |
| If you have continued living donor candidate evaluations, what modalities do you use for patient interactions?          | Select all that apply | <ul style="list-style-type: none"> <li>• Assessment in clinic</li> <li>• Telehealth: telephone-based</li> <li>• Telehealth: video-based</li> </ul>                                                                                                                                                        |
| Did your center use telehealth for donor evaluation prior to the COVID-19 pandemic?                                     | Single answer         | <ul style="list-style-type: none"> <li>• Yes</li> <li>• No</li> </ul>                                                                                                                                                                                                                                     |
| What elements of the living donor evaluation does your center use telehealth to perform?                                | Select all that apply | <ul style="list-style-type: none"> <li>• Medical evaluation</li> <li>• Surgical evaluation</li> <li>• Social work evaluation</li> <li>• ILDA evaluation</li> <li>• Dietician evaluation</li> <li>• Coordinator education</li> <li>• Other</li> </ul>                                                      |
| What has been your volume of living donor candidate evaluations during the pandemic?                                    | Single answer         | <ul style="list-style-type: none"> <li>• None (we have paused evaluations)</li> <li>• Very decreased (&gt;0 to &lt;25% typical)</li> <li>• Moderately decreased (25% to &lt;50% typical)</li> <li>• Slightly decreased (50% to &lt;80% typical)</li> <li>• About the same</li> <li>• Increased</li> </ul> |
| Have you continued living donor candidate lab testing during the pandemic?                                              | Single answer         | <ul style="list-style-type: none"> <li>• Yes</li> <li>• No</li> </ul>                                                                                                                                                                                                                                     |
| If you continued living donor candidate lab testing during the pandemic, where are labs performed?                      | Select all that apply | <ul style="list-style-type: none"> <li>• Transplant hospital</li> <li>• Community lab</li> <li>• Home-based phlebotomy service</li> </ul>                                                                                                                                                                 |
| Have you continued other forms of living donor candidate testing during the pandemic (e.g. radiology, cardiac testing)? | Single answer         | <ul style="list-style-type: none"> <li>• Yes</li> <li>• No</li> </ul>                                                                                                                                                                                                                                     |

|                                                                                                                          |                       |                                                                                                                                                                                                                                                                                                                                                                                                                                                                                                                                                                                                      |
|--------------------------------------------------------------------------------------------------------------------------|-----------------------|------------------------------------------------------------------------------------------------------------------------------------------------------------------------------------------------------------------------------------------------------------------------------------------------------------------------------------------------------------------------------------------------------------------------------------------------------------------------------------------------------------------------------------------------------------------------------------------------------|
| What barriers to living donor candidate evaluation have you encountered related to the pandemic?                         | Select all that apply | <ul style="list-style-type: none"> <li>• Donor concern/refusal</li> <li>• Reduced intake staff</li> <li>• Reduced patient inquiries</li> <li>• Limited access to evaluation testing</li> <li>• Insufficient personal protective equipment (PPE)</li> <li>• Local "Stay At Home" orders</li> <li>• No barriers</li> <li>• Other</li> </ul>                                                                                                                                                                                                                                                            |
| What has been your volume of living donor transplantation during the pandemic?                                           | Single answer         | <ul style="list-style-type: none"> <li>• None (program on hold)</li> <li>• Very decreased (Active, but &lt;25% typical)</li> <li>• Moderately decreased (25% to &lt;50% typical)</li> <li>• Slightly decreased (50% to &lt;80% typical)</li> <li>• About the same</li> <li>• Increased</li> </ul>                                                                                                                                                                                                                                                                                                    |
| What barriers to living donor transplant surgery have you encountered related to the pandemic?                           | Select all that apply | <ul style="list-style-type: none"> <li>• Program concern for donor safety</li> <li>• Program concern for recipient safety</li> <li>• Patient concern / reluctance to proceed</li> <li>• Concern for program outcomes</li> <li>• Inadequate access to COVID-19 testing</li> <li>• Insufficient PPE</li> <li>• Diversion of operating room resources (e.g. ventilators) to other cases</li> <li>• Diversion of staff time to other duties</li> <li>• Restrictions from hospital administration</li> <li>• Government restrictions on elective cases</li> <li>• No barriers</li> <li>• Other</li> </ul> |
| Would you approve a living donor candidate for surgery based on telehealth evaluation only, without physical exam?       | Single answer         | <ul style="list-style-type: none"> <li>• Yes</li> <li>• No</li> </ul>                                                                                                                                                                                                                                                                                                                                                                                                                                                                                                                                |
| When are you planning to resume normal living donor transplantation procedures?                                          | Single answer         | <ul style="list-style-type: none"> <li>• Never interrupted</li> <li>• Within the next 2 weeks</li> <li>• Within the month</li> <li>• When the incidence of local COVID-19 cases has shown steady decline over 14 days</li> <li>• When recommended by professional guidelines</li> <li>• Program had paused, but now resumed</li> </ul>                                                                                                                                                                                                                                                               |
| When you resume living donation, when will you perform COVID-19 testing in asymptomatic patients in relation to surgery? | Single answer         | <ul style="list-style-type: none"> <li>• Within 24 hours</li> <li>• Within &gt;24 to 48 hours</li> <li>• Within &gt;48 to 72 hours</li> <li>• Will not test asymptomatic patients</li> </ul>                                                                                                                                                                                                                                                                                                                                                                                                         |
| What testing modality do you use for pre-surgical COVID-19 testing for living donors?                                    | Select all that apply | <ul style="list-style-type: none"> <li>• PCR, nasopharyngeal swab</li> <li>• PCR, other specimen</li> <li>• Serum IgG Antibody</li> <li>• Serum IgM Antibody</li> <li>• Serum Antigen</li> </ul>                                                                                                                                                                                                                                                                                                                                                                                                     |

|                                                                                                                                                                                               |                       |                                                                                                                                                                                                                                                                                                                                   |
|-----------------------------------------------------------------------------------------------------------------------------------------------------------------------------------------------|-----------------------|-----------------------------------------------------------------------------------------------------------------------------------------------------------------------------------------------------------------------------------------------------------------------------------------------------------------------------------|
| Where do you send pre-surgical COVID-19 testing for donors and recipients?                                                                                                                    | Select all that apply | <ul style="list-style-type: none"> <li>• Hospital lab</li> <li>• Community lab</li> <li>• Public health reference lab</li> </ul>                                                                                                                                                                                                  |
| How long do you ask local donors to self-quarantine prior to donation surgery?                                                                                                                | Single answer         | <ul style="list-style-type: none"> <li>• No general quarantine request</li> <li>• &gt; 0 to 2 days</li> <li>• 2 to 7 days</li> <li>• 7 to 14 days</li> <li>• Other</li> </ul>                                                                                                                                                     |
| If a donor has to travel to your center for surgery (i.e., residence is not local), how long will you require them to quarantine prior to surgery (in addition to negative COVID-19 testing)? | Single answer         | <ul style="list-style-type: none"> <li>• No quarantine with negative COVID-19 test</li> <li>• &gt; 0 to 2 days</li> <li>• 2 to 7 days</li> <li>• 7 to 14 days</li> <li>• Refuse donor</li> <li>• Prefer remote donation surgery</li> <li>• Other</li> </ul>                                                                       |
| Would your center accept a donor who has recovered from COVID-19 infection and is PCR negative but Antibody positive?                                                                         | Single answer         | <ul style="list-style-type: none"> <li>• Yes</li> <li>• No</li> </ul>                                                                                                                                                                                                                                                             |
| What measures does your center use to reduce risk of donor contracting COVID-19 during surgical hospitalization?                                                                              | Select all that apply | <ul style="list-style-type: none"> <li>• Separate COVID-19 and non-COVID-19 wards</li> <li>• PPE use for patients and staff</li> <li>• Staff screening</li> <li>• Other</li> </ul>                                                                                                                                                |
| Have you continued living donor follow-up during the pandemic?                                                                                                                                | Single answer         | <ul style="list-style-type: none"> <li>• Yes: clinical and labs</li> <li>• Yes: clinical only, but labs deferred</li> <li>• No (we have paused follow-up)</li> </ul>                                                                                                                                                              |
| If you have continued clinical living donor follow-up what modalities do you use for patient interactions?                                                                                    | Select all that apply | <ul style="list-style-type: none"> <li>• Assessment in clinic</li> <li>• Telehealth: telephone-based</li> <li>• Telehealth: video-based</li> </ul>                                                                                                                                                                                |
| If you continued living donor follow-up lab testing during the pandemic, where are labs performed?                                                                                            | Select all that apply | <ul style="list-style-type: none"> <li>• Transplant hospital</li> <li>• Community lab</li> <li>• Home-based phlebotomy service</li> </ul>                                                                                                                                                                                         |
| Has your center used telehealth for living donor follow-up prior to the COVID-19 pandemic?                                                                                                    | Single answer         | <ul style="list-style-type: none"> <li>• Yes</li> <li>• No</li> </ul>                                                                                                                                                                                                                                                             |
| What barriers to living donor follow-up have you encountered related to the pandemic?                                                                                                         | Select all that apply | <ul style="list-style-type: none"> <li>• Difficulty reaching patients</li> <li>• Reduced available staff time</li> <li>• Patient unwillingness to perform lab tests</li> <li>• Patient unwilling to come for on-site visit</li> <li>• Hospital restrictions on elective visits</li> <li>• No barriers</li> <li>• Other</li> </ul> |
| How has the COVID-19 pandemic impacted kidney paired donation (KPD) at your center?                                                                                                           | Single answer         | <ul style="list-style-type: none"> <li>• Continue all KPD</li> <li>• Continue only internal KPD</li> <li>• Halt all KPD</li> <li>• Center does not perform KPD</li> </ul>                                                                                                                                                         |

|                                                                                  |                       |                                                                                                                                                                                                                                                                           |
|----------------------------------------------------------------------------------|-----------------------|---------------------------------------------------------------------------------------------------------------------------------------------------------------------------------------------------------------------------------------------------------------------------|
| How do you counsel living donors about COVID-19 related risks?                   | Select all that apply | <ul style="list-style-type: none"><li>• The risk of contracting COVID-19 is not impacted by donation</li><li>• The risk of complications is not impacted by donation</li><li>• COVID-19 has been associated with acute kidney injury</li><li>• Other counseling</li></ul> |
| Do you plan to use telehealth for living donor care after the COVID-19 pandemic? | Single answer         | <ul style="list-style-type: none"><li>• Yes, at higher than pre-pandemic utilization</li><li>• Yes, selectively</li><li>• No</li></ul>                                                                                                                                    |
